# Supplementary material for: Hepatitis C virus kinetics by administration of pegylated interferon-α in human and chimeric mice carrying human hepatocytes with variants of theIL28Bgene
Source: HighWire-hosted journal article supplement (doi:10.1136/gutjnl-2012-302553), 2012-11-07
Supplement: gutjnl-2012-302553supp.pdf [file gutjnl-2012-302553supp.pdf]

1 **Supplementary Information**

2

3 ***Quantification of IFN-stimulated gene-expression levels***

4 Fluorescence real-time PCR analysis was performed using an ABI 7500 instrument (Applied  
 5 Biosystems, Foster City, CA) and TaqMan Fast Advanced gene expression assay (Applied  
 6 Biosystems). Thermal cycling conditions were as follows: a precycling period of 20 seconds at  
 7 95°C, followed by 45 cycles of denaturation at 95°C for 3 seconds and annealing/extension at  
 8 60°C for 30 seconds. TaqMan Gene Expression Assay primer and probe sets (Applied  
 9 Biosystems) are listed in Table 1.

10

11 **Table 1: Primers Used in Study**

|               |               |
|---------------|---------------|
| GAPDH         | Hs02758991_g1 |
| MX1           | Hs00895608_m1 |
| OAS1          | Hs00973637_m1 |
| PKR (EIF2AK2) | Hs00169345_m1 |
| TLR3          | Hs01551078_m1 |
| RIG-I (DDX58) | Hs00204833_m1 |
| IL28A         | Hs00820125_g1 |
| IL28B         | Hs04193049_gH |
| IL29          | Hs00601677_g1 |

12

13 For standard gene expression experiments, we selected the best coverage set of predesigned  
 14 real-time PCR assays available for TaqMan® Gene Expression Assays provided from Applied  
 15 Biosystems except for IL28B primer and probe sets, because TaqMan Gene Expression Assay  
 16 primer and probe sets of IL28B transcript can be cross-reactive to IL28A transcript.

17
